# Supplementary material
Source: PubMed Central journal article supplement (PMC4785171)

### Supplemental Figures 1-3

Whitney J. Cowell, Sally A. Lederman, Andreas Sjödin, Richard Jones, Shuang Wang, Frederica P. Perera, Richard Wang, Virginia A. Rauh, Julie B. Herbstman

#### Prenatal exposure to polybrominated diphenyl ethers and child attention problems at 3–7 years

Neurotoxicology and Teratology, Volume 52, Part B, 2015, 143–150

dx.doi.org/10.1016/j.ntt.2015.08.009

#### Supplemental Fig. 1.

Associations (IRRs) between [prenatal](#) PBDE exposure and attention problems at age 4 years, stratified by child sex. Boys are represented by navy blue markers and girls are represented by red markers. Associations with PBDEs parameterized as a continuous variable (left panel) represent the rate change in attention problems per ln-unit increase in PBDE concentration (ng/g lipid). Associations with PBDEs parameterized as a dichotomous variable (right panel) represent the rate change in attention problems for the highest 20% of the PBDE exposure distribution compared to the lowest 80%. Models are adjusted for age at assessment, ethnicity, prenatal environmental tobacco smoke, maternal [intelligence](#) (TONI-2), maternal age, marital status and maternal demoralization at the time of the behavioral assessment.

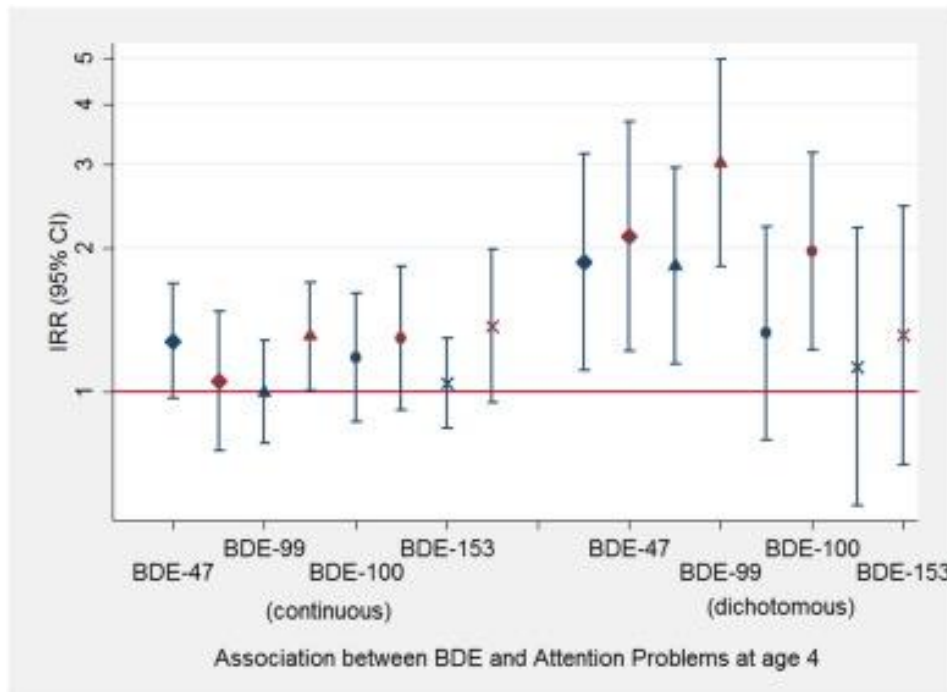

## Supplemental Fig. 2.

Associations between **prenatal** PBDE exposure and attention problems at age 6 years, stratified by child sex. Boys are represented by navy blue markers and girls are represented by red markers. Associations with PBDEs parameterized as a continuous variable (left panel) represent the rate change in attention problems per ln-unit increase in PBDE concentration (ng/g lipid). Associations with PBDEs parameterized as a dichotomous variable (right panel) represent the rate change in attention problems for the highest 20% of the PBDE exposure distribution compared to the lowest 80%. Models are adjusted for age at assessment, ethnicity, prenatal environmental tobacco smoke, **maternal intelligence** (TONI-2), maternal age, marital status and maternal demoralization at the time of the behavioral assessment.

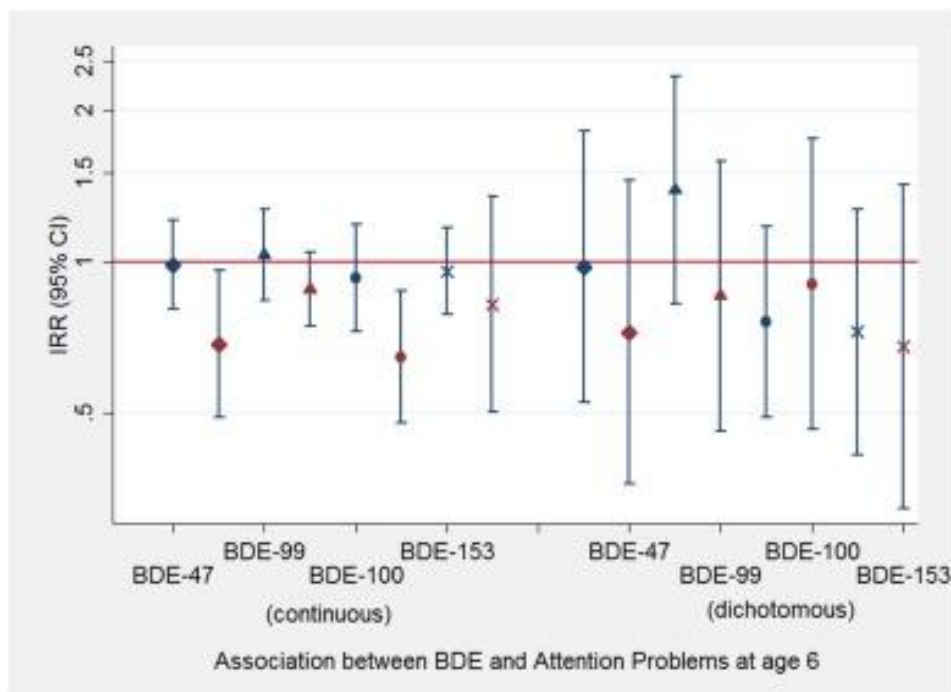

**Supplemental Fig. 3.**

Mean maternal demoralization score over time by proximity to the World Trade Center (WTC) site on 9/11/2001 (year 0). Blue diamond markers and solid line represent women who reported that dust from the WTCs fell on them on 9/11; purple triangle markers and dashed line represent women who were in visual distance of the WTC on 9/11; green circle markers and dotted line represent women who were not in visual distance of the WTC on 9/11.

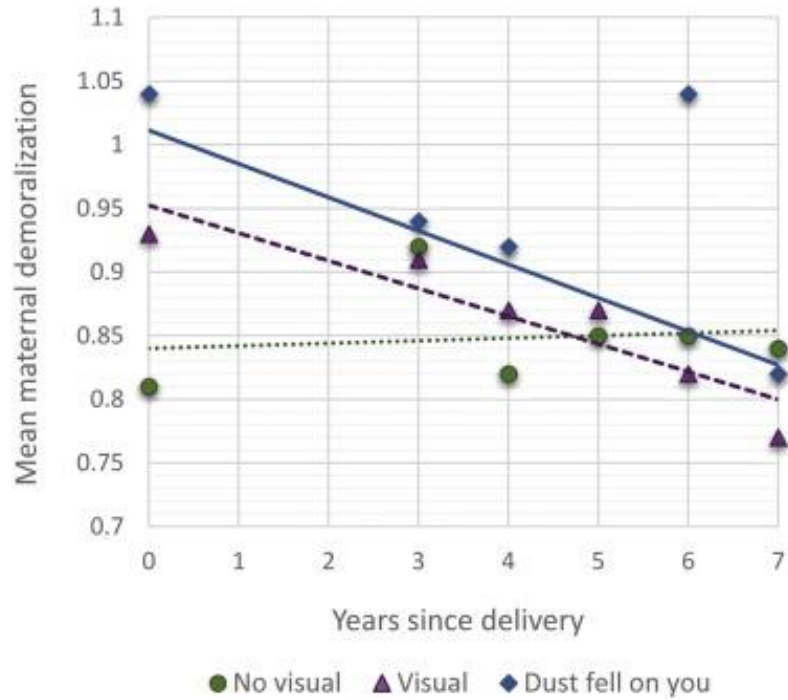

Supplement: NIHMS759857-supplement-Supplemental_Figures.pdf [file NIHMS759857-supplement-Supplemental_Figures.pdf]
